1 **Skin Delivery of Modified Vaccinia Ankara Viral Vectors Generates Superior T**  
2 **Cell Immunity Against a Respiratory Viral Challenge**

3 Youdong Pan<sup>1</sup>, Luzheng Liu<sup>1</sup>, Tian Tian<sup>1</sup>, Jingxia Zhao<sup>1,2</sup>, Chang Ook Park<sup>1</sup>, Serena Y. Lofftus<sup>1</sup>,  
4 Claire A. Stingley<sup>1</sup>, Shenglin Mei<sup>2</sup>, Xing Liu<sup>3</sup>, and Thomas S. Kupper<sup>1,4,\*</sup>

5 <sup>1</sup>Department of Dermatology and Harvard Skin Disease Research Center, Brigham and Women's  
6 Hospital, Boston, Harvard Medical School, Boston, Massachusetts, USA.

7 <sup>2</sup>Department of Biomedical Informatics, Harvard Medical School, Boston, Massachusetts, USA.

8 <sup>3</sup>The Center for Microbes, Development and Health, Key Laboratory of Molecular Virology and  
9 Immunology, Institut Pasteur of Shanghai, Chinese Academy of Sciences, Shanghai, China.

10 <sup>4</sup>Dana-Farber/Brigham and Women's Cancer Center, Boston, Massachusetts, USA.

11

12 \*Correspondence should be addressed to [tkupper@bwh.harvard.edu](mailto:tkupper@bwh.harvard.edu)

13

14

15 **Abstract**

16 Modified Vaccinia Ankara (MVA) was recently approved as a Smallpox vaccine. Transmission  
17 of Variola is by respiratory droplets, and MVA delivered by skin scarification (s.s.) protected  
18 mice far more effectively against lethal respiratory challenge with VACV than any other route of  
19 delivery, and at much lower doses. Comparisons of s.s. with intradermal, subcutaneous or  
20 intramuscular routes showed that MVA<sub>OVA</sub> s.s.-generated T cells were both more abundant and  
21 transcriptionally distinct. MVA<sub>OVA</sub> s.s. produced greater numbers of lung Ova-specific CD8<sup>+</sup>  
22 T<sub>RM</sub> and was superior in protecting mice against lethal VACV<sub>OVA</sub> respiratory challenge. Nearly  
23 as many lung T<sub>RM</sub> were generated with MVA<sub>OVA</sub> s.s. compared to direct pulmonary  
24 immunization with MVA<sub>OVA</sub>, and both routes vaccination protected mice against lethal  
25 pulmonary challenge with VACV<sub>OVA</sub>. Strikingly, MVA<sub>OVA</sub> s.s.-generated effector T cells  
26 exhibited overlapping gene transcriptional profiles to those generated via direct pulmonary  
27 immunization. Overall, our data suggest that heterologous MVA vectors delivered via s.s. are  
28 uniquely well-suited as vaccine vectors for respiratory pathogens like COVID-19. In addition,  
29 MVA delivered via s.s. could represent a more effective dose-sparing smallpox vaccine.

30

31 Vaccines against viral and bacterial pathogens have become a fundamental part of pediatric and  
32 adult patient care<sup>1-4</sup>. Once ubiquitous diseases like smallpox, polio, measles, tetanus, and  
33 diphtheria have either been eliminated or substantially reduced in incidence by vaccination in  
34 most of the industrialized world. Vaccination against seasonal influenza has been more  
35 challenging, and vaccination against HIV has proven elusive<sup>5-7</sup>. Vaccines against emerging  
36 diseases like Ebola, SARS, and MERS and most recently COVID-19 are the subject of intense  
37 interest and widespread activity<sup>8-10</sup>. Most vaccines are administered by intramuscular or  
38 subcutaneous injection. While readily accessible, skeletal muscle tissue is poorly adapted to  
39 initiating immune responses, as is subcutaneous adipose tissue<sup>11</sup>. In contrast, upper layers of the  
40 skin are the site of continuous and multiple immune responses over a lifetime<sup>12</sup>. Smallpox  
41 vaccination through skin with Vaccinia virus (VACV) has been uniquely successful<sup>2,11</sup>.

42 The eradication of smallpox by worldwide epicutaneous immunization with VACV was  
43 the greatest public health achievement of the 20<sup>th</sup> century<sup>2</sup>. Since that time, VACV has been  
44 employed as a vaccine vector in many settings<sup>13</sup>. However, its use has been limited by  
45 unacceptable morbidity, particularly in recipients who are immunocompromised<sup>14</sup>. More  
46 recently, Modified Vaccinia Ankara (MVA), a replication-deficient variant of VACV, has come  
47 into wider use<sup>15</sup>. Although it lacks ~10% of the parent genome<sup>16</sup>, it retains the immunogenicity  
48 of the parent virus and has just been approved by the FDA as a modern alternative for smallpox  
49 preventative vaccination<sup>17</sup>. Like VACV, it is also being widely used as heterologous vaccine  
50 vector<sup>18</sup>. However, MVA and derivative vectors are almost invariably delivered intramuscularly  
51 or subcutaneously<sup>19</sup>.

52 Several important features of smallpox vaccination deserve to be re-emphasized. In the 20<sup>th</sup>  
53 century, delivery of VACV i.m. was ineffective at conferring protection against smallpox. In

54 contrast, development of a cutaneous “pox” lesions, achieved only after epicutaneous  
55 immunization, was considered emblematic of successful protective vaccination, suggesting that  
56 this mode of delivery was critically important<sup>14</sup>. In addition, smallpox vaccination was effective  
57 in patients with agammaglobulinemia, while VACV immunization had disastrous complications  
58 in patients with T cell deficiency<sup>20</sup>. This suggested that T cells were critically important for  
59 protective immunity<sup>21,22</sup>. Finally, Variola virus is transmitted via respiratory droplets, suggesting  
60 an oropharyngeal-pulmonary mode of transmission<sup>23</sup>. It is notable that murine models of  
61 epicutaneous skin immunization with VACV generate memory T cell populations in both skin  
62 and lung, and these lung memory T cells protect against lethal pulmonary challenge with this  
63 virus<sup>11</sup>. Intramuscular immunization with VACV in these models did not yield comparable  
64 protection. This suggests that protection against smallpox is at least in part mediated by T  
65 cells<sup>22,24</sup>, and that skin immunization is an effective means of generating protective memory T  
66 cell populations in the lung<sup>11</sup>.

67 In the present study, we asked whether immunization with MVA was more effective and  
68 more effective if delivered epicutaneously (s.s.) as compared to intramuscularly (i.m.). We also  
69 asked whether skin immunization with an MVA vector generated populations of antigen specific  
70 CD8<sup>+</sup> T cells in lung as well as skin. In addition, epicutaneous immunization was compared to  
71 intradermal, subcutaneous, and intramuscular immunization in generated protective immunity  
72 against a lethal pulmonary challenge. Finally, we asked if T cell imprinting by skin draining and  
73 lung draining nodes was similar.

74

75

76

## 77 **Results**

78 Doses from  $10^4$  pfu to  $10^7$  pfu of MVA were used for epicutaneous immunization (s.s.),  
79 and after 7 days, lymph node and spleen T cells were harvested and stimulated *in vitro* with  
80 VACV infected splenocytes, after which IFN- $\gamma$  production was measured. All MVA doses led to  
81 significant T cell IFN- $\gamma$  production, with  $10^6$  and  $10^7$  pfu being equally potent (**Fig. 1a,b**). Other  
82 groups of mice were immunized with these doses, and after 30 days these mice were challenged  
83 on the skin with VACV. After 6 days, biopsies of the immunized sites were taken and VACV  
84 DNA was measured by PCR. All immunization doses led to diminished VACV DNA at the  
85 infected site (compared to unimmunized controls), but  $10^6$  and  $10^7$  pfu immunization showed  
86 superior protection (**Fig. 1c**). Other groups of mice were immunized in an identical manner and  
87 were subjected to lethal intranasal infection with VACV at day 30. All unimmunized mice  
88 rapidly lost weight and succumbed to the infection. In contrast, 40% of  $10^4$ , 70% of  $10^5$ , and  
89 100% of  $10^6$  and  $10^7$  pfu immunized mice survived the infection (**Fig. 1d,e**). Thus,  $10^6$  pfu is the  
90 lowest MVA dose that provides both strong T cell cytokine production as well as optimal  
91 protective immunity against skin and pulmonary infection.

92 To test whether delivery of MVA to scarified skin could induce poxvirus-specific  
93 immune responses, we inoculated C57BL/6 mice with MVA or Vaccinia Virus (VACV) by  
94 scarification. By 7 days after inoculation, a pustular lesion resembling a “pox” reaction had  
95 formed at the inoculation site in all the immunized mice. The pox lesions induced by MVA and  
96 VACV skin scarification followed similar patterns of evolution (although with different size and  
97 kinetics), from macules to papules to vesicles and finally into pustules which ruptured and healed  
98 over time with scars (**Extended data, Fig. 1**). MVA-induced pox reactions did heal more rapidly  
99 than those induced by replication competent VACV (**Extended data, Fig. 1**). To determine the

100 safety of MVA in immunocompromised hosts, we next immunized immunodeficient Rag1<sup>-/-</sup>  
101 mice with VACV and MVA, respectively, and followed the mice for several weeks. While both  
102 groups of mice lost some weight over the first two weeks, MVA immunized mice rapidly  
103 regained the weight and flourished over the next several weeks (**Fig. 1g**). In contrast, 100% of  
104 the VACV immunized mice developed progressive weight loss and expanding cutaneous lesions  
105 of VACV infection, ultimately requiring euthanasia (**Fig. 1f-h**). Thus, MVA can be administered  
106 safely to mice wholly deficient in adaptive immunity. In another set of experiments, we  
107 immunized Wild-type (WT) mice as well as mice deficient in either Langerhans cells (Langerin  
108 DTA) or both Langerhans cells and langerin positive dermal dendritic cells (Langerin DTR +  
109 DT), respectively. Prior to infection, mice were loaded with OT-1 cells and the immunizing virus  
110 was MVA<sub>OVA</sub>. Spleen and lymph nodes were harvested at days 10 and 30, skin was harvested at  
111 day 30, and OT-1 T cells were counted. At day 10, T<sub>eff</sub> cells were somewhat diminished in  
112 Langerin DTA mice and more markedly diminished in Langerin DTR + DT mice (**Fig. 1i**). At  
113 day 30, skin T<sub>RM</sub> were significantly diminished in Langerin DTA mice and even more  
114 diminished in Langerin DTR+DT mice (**Fig. 1i**). This pattern was also true for T cells bearing  
115 markers of T<sub>CM</sub> and T<sub>EM</sub>. These data suggest that both LC and langerin positive dermal DC play  
116 an additive role in optimal antigen presentation of MVA-encoded antigens to T cells.

117 We next compared the anatomical route of vaccine delivery on the T cell response to  
118 MVA vaccination. Using CFSE OT-1 loaded mice, MVA<sub>OVA</sub> was delivered by epicutaneous  
119 infection (s.s.), or injected intradermally (i.d.), subcutaneously (s.c.), or intramuscularly (i.m.).  
120 Draining lymph nodes were harvested at 60 hours and 5 days, and OT-1 cells were analyzed by  
121 FACS. LN from s.s. immunized mice showed roughly 90% of OT-1 proliferating, and 60%  
122 making IFN- $\gamma$ , at 60 hours, with comparable numbers at 5 days (**Fig. 2a,c**). Vaccination by i.d.

123 was less effective, with 71% of OT-1 cells proliferating and 33% making IFN- $\gamma$  at 60 hours, with  
124 modest improvement at 5 days post infection (**Fig. 2a,c**). Both s.c. and i.m. showed poor OT-1  
125 activation at 60 hours with some improvement at 5 days (**Fig. 2a,c**). When lymph node or spleen  
126 OT-1 cells were stimulated with antigen, significantly more IFN- $\gamma$  was produced by OT-1 cells  
127 from mice vaccinated via s.s. compared to other routes (**Extended data, Fig. 2**). Vaccination via  
128 i.d. was intermediate with regard to IFN- $\gamma$  production, while s.c. and i.m. led to nearly four-fold  
129 lower IFN- $\gamma$  levels (**Extended data, Fig. 2**). In terms of absolute numbers of OT-1 cells  
130 generated, s.s. was superior to all modes of vaccination, with i.d. being second and both i.m. and  
131 s.c. far less effective (**Fig. 2b,d**). We next took OT-1 cells from the 5-day post-immunization  
132 time point and performed transcriptional profiling on OT-1 cells generated after s.s., i.d., s.c., or  
133 i.m., respectively. While there was some overlap, there were surprisingly many differences  
134 between T cells generated by different routes of immunization, even at the same day post  
135 immunization (**Fig. 2e, Extended data, Fig. 3**). Principal component analysis revealed that T<sub>eff</sub>  
136 generated by s.s. and i.m. were transcriptionally quite distinct. T cells generated after s.s., i.d.,  
137 and s.c., were more similar but still quite distinct from one another. T cells generated by s.s. and  
138 i.d. clustered closely but were still clearly not overlapping. Moreover, s.s. generated most  
139 abundant skin infiltrating cells at day 5 post immunization (**Fig. 2g**).

140 We next examined memory OT-1 T cells generated at 45 days by these four routes of  
141 immunization. With regard to T<sub>CM</sub>, s.s. generated the largest population of these cells, roughly  
142 twice as many as i.m. (**Fig. 3a**). The difference was even more striking when T<sub>EM</sub> were  
143 examined; here, s.s. generated at least 3-fold more cells than did other modes of immunization,  
144 with s.c. being least effective (**Fig. 3b**). T<sub>RM</sub> were then examined, in both skin and lung.  
145 Immunization via s.s. generated 3-fold more skin T<sub>RM</sub>, and more than twice as many T<sub>EM</sub>, with

146 i.d. being the second most effective route (**Fig. 3-f**). Because MVA is often delivered i.m., it is  
147 important to note that the number of T<sub>RM</sub> generated by this route was more than 4-fold lower  
148 than by s.s. (**Fig. 3 c-f**). Transcriptional profiling showed that at 45 days, OT-1 T<sub>EM</sub>'s still  
149 showed non-overlapping PCA clusters from s.s, i.d., s.c., and i.m. immunized mice. In contrast,  
150 T<sub>CM</sub> from the same mice showed transcriptional profiles that were more tightly clustered,  
151 indicating that differences between the groups were minimal (**Fig. 2e**). Skin T<sub>RM</sub> could not be  
152 compared because insufficient 45-day T<sub>RM</sub> were generated by i.m. and s.c. immunization.

153         In subsequent experiments, we examined groups of mice vaccinated by these different  
154 routes for their ability to respond to a lethal intranasal challenge of VACV<sub>OVA</sub>. Groups of ten  
155 mice assayed 45 days after initial vaccination were subjected to intranasal challenge, and mice  
156 were weighed daily after vaccination. Mice that lost >20% of body weight were sacrificed.  
157 **Figure 3g and h** show that naïve mice universally succumbed to the lethal infection, while mice  
158 immunized epicutaneously (s.s.) showed minor transient weight loss but complete survival. In  
159 contrast, mice vaccinated i.d., s.c., or i.m. lost substantial weight (**Fig. 3g**), and while 60% of i.d.  
160 vaccinated mice survived, only 40% and 30% of mice vaccinated i.m. and s.c., respectively,  
161 survived (**Fig. 3h**). These results are consistent with the superior production of different memory  
162 T cell subsets after vaccination by s.s..

163         We were struck by the capacity of skin immunization via s.s. to generate both skin T<sub>RM</sub>  
164 and lung T<sub>RM</sub>. While skin and gut T cell trafficking have been studied extensively, lung T cell  
165 trafficking has been studied less comprehensively. We immunized CFSE OT-1 loaded mice with  
166 MVA<sub>OVA</sub> via three routes: s.s. to assess skin homing, intraperitoneally (i.p.) to assess gut  
167 homing, and intra-tracheally (i.t.) to assess lung homing. At 60 hours, T cells were collected  
168 from the respective draining lymph nodes (inguinal for skin, mesenteric for gut, and mediastinal



169 for lung) and were sorted based on CFSE expression into cells that had not divided (P0) or had  
170 divided once through five times (P1-P5; **Fig. 4a**). Cells were subjected to transcriptional  
171 profiling, and results were analyzed bioinformatically. By principal component analysis, P0 cells  
172 from skin, gut, and lung homing nodes clustered near each other (**Fig. 4b**). However, as early as  
173 P1 and clearly by P2, OT-1 cells activated in different nodes diverged significantly in  
174 transcriptional profile. In particular, OT-1 cells from mesenteric nodes were quite distinct from  
175 OT-1 cells from inguinal and mediastinal nodes (**Fig. 4b**). Interestingly, P1-P5 cells from  
176 inguinal (skin draining) node clustered closely with P1-P5 cells from mediastinal (lung draining)  
177 nodes, suggesting similar pathways involved in skin and lung homing imprinting (**Fig. 4b**).  
178 Excluding genes upregulated in all T cell groups, lung and skin homing T cells shared  
179 upregulation of 150 genes, compared to 73 and 90 upregulated in only skin or only lung,  
180 respectively (**Fig. 4c, d**). In contrast, only 11 upregulated genes were shared between skin and  
181 gut, and only 36 between lung and gut. Examination of chemokine receptors and integrin genes  
182 showed homology between lung and skin, while gut immunization showed unique upregulation  
183 of CCR9,  $\alpha 4$  and  $\beta 7$  integrins (**Fig. 4e**). These data suggest a very similar pattern of gene  
184 expression of T cells activated in skin versus lung draining LN, and a pattern in gut draining LN  
185 that is very different from lung and skin draining LN.

186 We next directly compared the capacity of skin (s.s.), lung (i.t.), and gut (i.p.)  
187 immunization with MVA<sub>OVA</sub> to generate lung T<sub>RM</sub>. Mice were immunized by the above routes  
188 and after 45 days, lung T<sub>RM</sub> were analyzed. As expected, lung immunization resulted in the  
189 highest number of lung T<sub>RM</sub>, but skin immunization by s.s. generated more than half as many  
190 T<sub>RM</sub> in lung (**Fig. 4f**). In contrast, i.p. immunization resulted in less than 10% of the lung T<sub>RM</sub>  
191 compared to lung immunization (**Fig. 4f**). Like skin T<sub>RM</sub>, lung T<sub>RM</sub> were CD69<sup>+</sup>, CD103<sup>+</sup>,

192 CD62L<sup>-</sup>, KLRG1<sup>-</sup>, and expressed E and P selectin ligands (**Extended data, Fig. 4**). A  
193 companion cohort of mice were subjected to lethal intranasal challenge with VACV<sub>OVA</sub>. Mice  
194 immunized i.t. or s.s. showed mild weight loss but 100% recovery and survival (**Fig. 4g,h**). Mice  
195 immunized i.p. showed more severe weight loss, and only 60% survived the infectious challenge  
196 (**Fig. 4g,h**). In another series of experiments, i.t. immunization was compared to s.s.  
197 immunization with regard to generation of skin T<sub>RM</sub>. While s.s. was most efficient at generating  
198 skin T<sub>RM</sub>, lung immunization via i.t. generated 50% of the skin T<sub>RM</sub> compared to s.s.  
199 immunization (**Extended data, Fig. 5**). These data confirm that lung immunization can generate  
200 abundant skin T<sub>RM</sub>, and skin immunization can generate abundant lung T<sub>RM</sub>.  
201

## 202 **Discussion**

203 Smallpox vaccination via epidermal disruption using Vaccinia virus (VACV) provided  
204 broad and effective protective immunity against Smallpox caused by Variola major, and led to  
205 the eradication of this devastating infectious disease<sup>14</sup>. MVA is derived from VACV but has lost  
206 10% of the parent genome, including several immune inhibitory genes that block CC  
207 chemokines, IFN $\alpha/\beta$ , IFN $\gamma$ , TNF $\alpha$ , and STING<sup>25</sup>, and does not replicate in mammalian cells<sup>18</sup>.  
208 In addition to its use as a smallpox vaccine, MVA has been used extensively as a heterologous  
209 vaccine vector<sup>15</sup>, although we were unable to find any description of it being delivered through  
210 skin scarification. Rather, intramuscular or subcutaneous injection appear to be the preferred  
211 routes. There are no clear reasons that MVA has not been delivered via s.s., other than the  
212 assumption that replication was required for this route of administration. Here, we show that  
213 MVA delivered by s.s. can provoke a potent immune response at doses much lower than those  
214 used for i.m. and s.c. injection. In a direct comparison of delivery via i.m., s.c., and i.d. routes,  
215 s.s. administration of lower doses of MVA provide superior protective immunity against a lethal  
216 VACV challenge. These data suggest that like VACV, MVA delivered by s.s. provides a potent  
217 and durable immune response. We found that both Langerhans cells and CD207+ dermal  
218 dendritic cells were both required for optimal immunization via this route. In contrast to VACV,  
219 mice deficient in adaptive immunity could be safely immunized via s.s. with MVA, supporting  
220 the safety of this vector in immunocompromised hosts. One other advantage of the s.s. mode of  
221 delivery is dose sparing—doses of MVA too low to elicit immune response i.m. are quite  
222 immunogenic when delivered by s.s.

223 When used as a heterologous vaccine vector encoding for a T cell antigen, MVA<sub>OVA</sub>  
224 delivered s.s. provided robust early activation of OVA-specific T cells (OT-1) in skin draining

225 lymph nodes. Interestingly, early CD8<sup>+</sup> effector T cells in skin draining lymph nodes at day 5  
226 showed different patterns of gene expression after immunization s.s., i.d., s.c., and i.m.,  
227 respectively. T cells generated by i.m. immunization were most distinct transcriptionally from  
228 those generated by s.s. immunization. When T cells were harvested from spleens at day 45 after  
229 immunization, cells with T<sub>EM</sub> markers retained distinct transcriptional profiles, with i.m.  
230 generated T<sub>EM</sub> cells being most distinct from s.s. generated T<sub>EM</sub> cells. Day 45 memory T cells  
231 expressing CD62L (T<sub>CM</sub>) showed smaller transcriptional differences across immunization routes,  
232 but s.s. generated T<sub>CM</sub> cells were still readily distinguished from those generated by i.m.  
233 immunization. These surprising data suggest that there are qualitative differences in T<sub>eff</sub> and T<sub>M</sub>  
234 cells generated by immunization route that are evident by day 5 and persist at day 45.

235         There were also quantitative differences in T<sub>M</sub> generation depending on route of  
236 administration. Immunization via s.s. generated greater numbers of both T<sub>EM</sub> and T<sub>CM</sub> at 45 days  
237 after immunization. When skin T<sub>RM</sub> were measured, s.s. generated more T cells than other routes,  
238 with i.m. being least efficient. Because lethal intranasal challenge with VACV results in death  
239 from pulmonary inflammation, we also measured lung T<sub>RM</sub>. Strikingly, s.s. generated higher  
240 numbers of lung T<sub>RM</sub> than other routes, consistent with previous reports<sup>11,26</sup>, with i.m. generating  
241 fewest lung T<sub>RM</sub>. T<sub>RM</sub> from skin and lung both expressed CD69 and CD103, with expression of  
242 E- and P-selectin ligands detectable as well. When animals were challenged by lethal intranasal  
243 infection with VACV<sub>OVA</sub>, only mice immunized by s.s. showed minimal weight loss and 100%  
244 survival. Mice immunized by all other routes showed greater morbidity and some mortality, with  
245 i.m. immunization being least effective. Whether the ability of s.s. immunized mice to uniformly  
246 survive the intranasal challenge of VACV<sub>OVA</sub> was due to higher numbers of lung T<sub>RM</sub>,  
247 circulating T<sub>EM</sub> and T<sub>CM</sub>, or qualitatively different T<sub>eff</sub> and memory T cells cannot be determined

248 from these data. However, this suggests that the original method of smallpox vaccination— s.s.  
249 administration—appears to be uniquely effective at generating robust protective immunity  
250 against airway challenge.

251 Because s.s. immunization was so efficient at generating lung T cells and protective  
252 immunity against a pulmonary infectious challenge, we compared skin infection with direct lung  
253 infection, and assess T<sub>eff</sub> in skin and lung draining LN, respectively, using i.p. injection and  
254 mesenteric nodes as a control. Thus, three routes of immunization were compared— s.s.,  
255 intratracheal (i.t.), and intraperitoneal (i.p.), and T<sub>eff</sub> from draining lymph nodes—inguinal,  
256 mediastinal, and mesenteric, respectively--- were compared by transcriptional profiling. While  
257 proliferating T<sub>eff</sub> from skin graining and gut draining nodes rapidly diverged, proliferating T<sub>eff</sub>  
258 from skin draining and lung draining nodes showed significant overlap over time. Both  $\alpha 1\beta 1$   
259 intergrin, CCR4, and CCR8 were preferentially elevated in T cells from skin and lung draining  
260 nodes, and  $\alpha 4\beta 7$  and CCR9 were preferentially upregulated in mesenteric lymph nodes,  
261 consistent with previously reported data<sup>27-29</sup>. When lung T<sub>RM</sub> were examined after 45 days, both  
262 skin and lung infection generated abundant lung T<sub>RM</sub>, while i.p. immunization was less efficient  
263 at generating these cells. Protection against lethal intranasal challenge was complete in skin and  
264 lung immunized mice, but incomplete after i.p. immunization. These data suggest that there is  
265 substantial overlap in T cells imprinted by skin and lung draining lymph nodes and suggests that  
266 skin immunization is well-suited at generating T cells with lung tropic properties.

267 Two important conclusions can be drawn from this study that are relevant to human  
268 disease. First, immunization with MVA generates powerful immunity, but like VACV the most  
269 potent local and systemic immunity generated occurs after superficial skin immunization (s.s.)  
270 that involves epidermal disruption. The dose of MVA used in s.s. delivery can be much lower

271 than required in muscle/i.m. delivery. This suggests that doses of MVA being stockpiled in  
272 anticipation of a dystopian future smallpox attack may protect orders of magnitude for more  
273 people if delivered s.s. instead of MVA. The second conclusion is that MVA delivered by s.s. is  
274 a very effective way of generating protective  $T_{RM}$  in lung, in addition to a more robust circulating  
275 T cell response. MVA vaccines are being developed for respiratory pathogens, including  
276 influenza A and respiratory syncytial virus<sup>30,31</sup>, but these are being tested only by i.m. or s.c.  
277 injection. Our data strongly suggests that delivering these vaccines via s.s. may generate even  
278 more effective protective immunity to pathogens that infect lung. Whether MVA encoding for  
279 Coronavirus genes and delivered s.s. could provide protective immunity against COVID-19 is an  
280 intriguing question that we are pursuing presently.

281

## 282 **Methods**

283 Methods and associated references are available in the online version of the paper.

## 284 **Acknowledgements**

285 We thank Dr. Mike Seaman (Beth Israel Deaconess Medical Center, Boston, MA) for providing  
286 the initial stock of MVA, Dr. Bernard Moss (NIH) for providing the initial stocks of VACV.

287 This work was supported by grants R01 AI127654 to Dr. T. S. Kupper from National Institutes  
288 of Health/NIAID and R01 AR065807 from the National Institutes of Health/NIAMS.

## 289 **Supplementary Information**

290 Supplementary Information is linked to the online version of the paper.

## 291 **Competing interests statement**

292 The authors declare that they have no competing financial interests.

293 **Figure Legends**

294 **Figure 1. MVA immunization via skin scarification (s.s.) elicits dose-dependent anti-**  
295 **vaccinia immune response. a-b.** IFN- $\gamma$  secretion by vaccinia-specific T cells isolated from  
296 draining lymph nodes (a) or spleens (b) at 7 days post MVA infection at indicated dose. **c.**  
297 Quantitative real time PCR (qRT-PCR) analysis of skin viral load at 6 days post re-infection.  
298 Mice were immunized with the indicated doses of MVA via s.s. 45 days later, mice were re-  
299 challenged with  $1.8 \times 10^6$  pfu vaccinia virus (VACV). Then 6 days later, skin tissues were  
300 harvested and processed to qRT-PCR. **d-e.** Body weight (BW) (d) and survival measurements (e)  
301 of WR-VACV re-challenged mice that were immunized previously with MVA at indicated dose  
302 45 days earlier. **f.** Photographs of pox lesion in Rag1<sup>-/-</sup> mice taken on day 4, 7, 14 and 28 post-  
303 immunization with the same amount ( $1.8 \times 10^6$  pfu) of MVA or VACV. **g-h.** Immunized Rag1<sup>-/-</sup>  
304 mice were monitored for BW change (g) and survival (h) for up to 12 weeks after immunization  
305 with the same amount ( $1.8 \times 10^6$  pfu) of MVA or VACV. **i.** Quantification of effector T cell (T<sub>eff</sub>,  
306 day 5), central memory (T<sub>CM</sub>, day 45), effector memory (T<sub>EM</sub>, day 45) or tissue resident memory  
307 (T<sub>RM</sub>, day 45) T cells post MVA infection. Naïve OT-I Thy1.1<sup>+</sup> cells were transferred into  
308 Thy1.2<sup>+</sup> recipient mice one day before mice were infected with  $1.8 \times 10^6$  pfu MVA-Ova. Then at  
309 different time points post infection, OT-I cells were isolated from lymph nodes (T<sub>eff</sub>, T<sub>CM</sub>, T<sub>EM</sub>)  
310 or skin (T<sub>RM</sub>) and analyzed by flow cytometry. a-c. Data is representative of three independent  
311 experiments. Symbols represent individual mice (n = 5 mice/group). c-d. Unimmunized (UI)  
312 mice were included as controls. Graphs show mean  $\pm$  s. d., ns = not significant, \*p < 0.05, \*\*p <  
313 0.01.

314 **Figure 2. Delivery of MVA via s.s. generates T cells that are both quantitatively more**  
315 **abundant and qualitatively distinct from those generated from i.d., s.c., i.m.. a-d.** Flow

316 cytometric analysis (a, c) and quantification (b, d) of OT-I cell proliferation in draining lymph  
317 nodes of recipient mice at 60 hours (a, b) and 5 days (c, d) post MVA infection via different  
318 routes. CFSE-labeled naïve OT-I Thy1.1<sup>+</sup> cells were transferred into Thy1.2<sup>+</sup> recipient mice one  
319 day before mice were infected with  $1.8 \times 10^6$  pfu MVA-Ova via indicated infection routes. **e.**  
320 Principal component analysis (PCA) of gene-expression for T cells generated by MVA infection  
321 via different routes. Naïve T cells (T<sub>N</sub>) were sorted from the peripheral lymph nodes of naïve  
322 OT-I mice. Effector T cells (T<sub>eff</sub>) were sorted from draining lymph nodes at 5 days post  
323 infection. Central memory T cells (T<sub>CM</sub>) and effector memory T cells (T<sub>EM</sub>) were sorted from the  
324 spleen of mice at 45 days post infection. Each dot represents an individual experiment wherein  
325 mRNA was pooled from 15-20 mice from 3-4 independent biological groups (5 mice/group). **f.**  
326 Heatmap of differentially expressed genes selected from a pair-wise comparison between s.s.  
327 generated T<sub>eff</sub> cells and naïve T cells. **g.** Quantification of skin infiltrating T cells at day 5 post  
328  $1.8 \times 10^6$  pfu MVA-Ova infection via indicated routes. a, c, Data are representative of three  
329 independent experiments (n = 5 mice per group). Graphs show mean  $\pm$  s. d. of 5 mice per group.  
330 \*p < 0.05, \*\*p < 0.01.

331 **Figure 3. Delivery of MVA via s.s. is superior in generating memory T cells and is superior**  
332 **in protecting mice against lethal respiratory challenge. a-b.** Quantification of OT-I T<sub>CM</sub> and  
333 T<sub>EM</sub> cells from spleen of mice at 45 days post MVA infection via indicated routes. **c-f.** Flow  
334 cytometric analysis (c, e) and quantification (d, f) of OT-I T<sub>RM</sub> cells isolated from skin (c, d) or  
335 lung (e, f) tissue at 45 days post MVA infection via indicated routes. **g-h.** Body weight (BW) (g)  
336 and survival measurements (h) of WR-VACV re-challenged mice that were previously  
337 immunized with MVA via indicated routes 45 days earlier. OT-I WT cells were adoptively  
338 transferred into  $\mu$ MT mice before mice were infected with  $1.8 \times 10^6$  pfu MVA via indicated



339 routes. 45 days later, mice were re-challenged with a lethal dose of WR-VACV by intranasal  
340 infection. c, e, Data are representative of three independent experiments (n = 5 mice per group).  
341 Graphs show the mean  $\pm$  s. d. of 5 mice per group. Un-immun. = un-immunized. \*\*p < 0.01.

342 **Figure 4. MVA s.s. generates more than half number of lung T<sub>RM</sub> compared to intra-**  
343 **tracheal (i.t.) and is sufficient to protect mice against lethal respiratory challenge. a.** Flow  
344 cytometric analysis of OT-I cell proliferation in draining lymph nodes at 60 hours post MVA  
345 infection via s.s.. CFSE-labeled naïve OT-I Thy1.1<sup>+</sup> cells were transferred into Thy1.2<sup>+</sup> recipient  
346 mice one day before mice were infected with  $1.8 \times 10^6$  pfu MVA-Ova. **b.** PCA of gene-  
347 expression data for nineteen CD8<sup>+</sup> T cell populations based on CFSE signal and different  
348 infection routes. Each dot represents an individual experiment wherein mRNA was pooled from  
349 15-20 mice from 3-4 independent biological groups (5 mice/group). **c.** Heatmap of differentially  
350 expressed genes selected from a pair-wise comparison between s.s. and intra-peritoneal (i.p.)  
351 activated T cells. **d.** Venn diagram analysis of genes differentially expressed in pairwise  
352 comparisons between s.s., i.t. and i.p. activated T cells relative to T<sub>N</sub> (fold change cutoff,  $\geq 2$ ). **e.**  
353 Quantitative real-time PCR (qRT-PCR) analysis of cell homing molecule gene expression in s.s.,  
354 i.t. and i.p. activated T cells. **f.** Flow cytometric analysis (left) and quantification (right) of lung  
355 T<sub>RM</sub> cells at day 45 post MVA infection via indicated routes. **g-h.** Body weight (BW) (g) and  
356 survival measurements (h) of WR-VACV re-challenged mice that were immunized previously  
357 with MVA via indicated routes 45 days earlier. OT-I WT cells were adoptively transferred into  
358  $\mu$ MT mice before mice were infected with  $1.8 \times 10^6$  pfu MVA via indicated routes. 45 days later,  
359 mice were re-challenged with a lethal dose of WR-VACV by intranasal infection. Graphs show  
360 the mean  $\pm$  s. d. of 5 mice per group. Un-immun. = un-immunized. ns = not significant, \*p <  
361 0.05, \*\*p < 0.01.

362 **Extended Data Figure Legends**

363 **Extended Data Figure 1. MVA skin scarification induced smaller pox lesions that healed**  
364 **significantly faster compared to VACV skin scarification in immunocompetent mice.**

365 C57BL/6 mice were immunized with  $1.8 \times 10^6$  pfu MVA or VACV by skin scarification.

366 Photographs of pox lesion were taken on day 4, 7, 14 and 28 post-immunization.

367 **Extended Data Figure 2. Delivery of MVA via s.s. generates stronger cellular responses**

368 **compared to i.d., s.c., and i.m. infection routes.** C57BL/6 mice were immunized with  $1.8 \times$

369  $10^6$  pfu MVA via indicated routes. Activated T cells in draining lymph nodes (a) and spleen (b)

370 were isolated at 7 days post infection, and T cell response against VACV was measured based on

371 IFN- $\gamma$  secretion. Symbols represent individual mice (n = 5 mice/group). \*p < 0.05, \*\*p < 0.01.

372 **Extended Data Figure 3. Delivery of MVA via s.s. generates T cells that are qualitatively**

373 **distinct from those generated from i.d., s.c., i.m.. a-b.** Venn diagram analysis of genes up-

374 regulated (a) or down-regulated (b) in pairwise comparisons between T cells activated via MVA

375 s.s., i.d., s.c., i.m. (day 5) relative to that of T<sub>N</sub>. **c-d.** Fold change analysis of genes shared among

376 s.s., i.d., s.c. and i.m. activated T cells (day 5) relative to that of T<sub>N</sub>. c, 146 shared up-regulated

377 genes, d, 41 shared down-regulated genes. **e.** Quantitative real-time PCR (qRT-PCR) analysis of

378 cell homing molecule gene expression in s.s., i.d., s.c. and i.m. activated T cells (day 5) relative

379 to that of T<sub>N</sub>. ns = not significant, \*p < 0.05, \*\*p < 0.01.

380 **Extended Data Figure 4. Phenotyping of tissue-resident memory T cell surface marker on**

381 **lung CD8<sup>+</sup> T<sub>RM</sub> cells generated by MVA infection via skin scarification, intra-tracheal**

382 **administration or intra-peritoneal injection.** Flow cytometric analysis of T cell proliferation

383 and homing receptor expression on OT-I cells residing in lung at 45 days post MVA infection.

384 Naïve OT-I Thy1.1<sup>+</sup> cells were transferred into Thy1.2<sup>+</sup> recipient mice one day before mice were

385 infected with  $1.8 \times 10^6$  pfu MVA-Ova by s.s., i.t. or i.p.. At 45 days after infection, proliferation  
386 and tissue-homing receptor expression of OT-I T<sub>RM</sub> cells isolated from lung tissue were analyzed  
387 by flow cytometry. Data are representative of three independent experiments (n = 5 mice per  
388 group). ESL, E-selectin ligand.

389 **Extended Data Figure 5. Skin T<sub>RM</sub> cells generated by MVA infection via skin scarification,**  
390 **intra-tracheal administration or intra-peritoneal injection.** Flow cytometric analysis and  
391 quantification of skin T<sub>RM</sub> cells at day 45 post  $1.8 \times 10^6$  pfu MVA infection via indicated routes.  
392 Data are representative of three independent experiments (n = 5 mice per group). \*\*p < 0.01.

393

394 **Online Methods**

395 **Mice**

396 Wide-type (WT) C57BL/6, CD45.1<sup>+</sup>, Thy1.1<sup>+</sup>, Rag1<sup>-/-</sup>,  $\mu$ MT, Langerin-DTA, Langerin-DTR  
397 mice were purchased from Jackson Laboratory. Thy1.1<sup>+</sup> Rag1<sup>-/-</sup> OT-I mice were maintained  
398 through routine breeding in the animal facility of Harvard Institute of Medicine, Harvard  
399 Medical School. Animal experiments were performed in accordance with the guidelines put forth  
400 by the Center for Animal Resources and Comparative Medicine at Harvard Medical School.  
401 Mice were randomly assigned to each group before start and experiments were performed  
402 blinded with respect to treatment. For survival experiments, mice that had lost over 25% of  
403 original BW were euthanized.

404 **Viruses**

405 An attenuated strain (VACV) of WR-VACV was used in some experiments as control vaccine  
406 and was a kind gift from Dr. Bernald Moss (National Institutes of Health, Bethesda, MD). Wild-  
407 type WR-VACV were purchased from American Tissue Culture Company (ATCC). The virus  
408 stocks were expanded and tittered in Hela cells and CV-1 cells (ATCC) by standard procedures.  
409 ACAM3000MVA (Acambis Modified Vaccinia Ankara) (MVA) and DF-1 Cells were gifted by  
410 Dr. Michael Seaman (Beth Israel Deaconess Medical Center, Boston MA). MVA stocks were  
411 expanded and titrated in DF-1 cells as previously described (39, 40).

412 **Virus Infection**

413 Mice were immunized with the MVA or VACV at the indicated doses by skin scarification as  
414 previously described. Alternatively, mice were immunized by s.c., i.d., or i.m. injection at the  
415 indicated dose. For secondary challenge, memory mice were challenged intranasally with a lethal

416 dose of WR-VACV ( $2 \times 10^6$  pfu in 20  $\mu$ l of PBS) at 6 to 20 weeks post immunization. The  
417 change of BW and survival of mice were monitored daily following challenge for up to 12 days.

#### 418 ***In vitro* restimulation assay**

419 Poxvirus-specific T cell response against poxvirus was assessed at day 7 post challenge. Single  
420 cell suspension prepared from draining lymph nodes or spleens was re-suspended in T cell  
421 medium (RPMI containing 10% FBS, 2mM 2- $\beta$  mercaptoethanol, 1X nonessential amino acid,  
422 1X sodium pyruvate), and were used as effector cells. For target cell preparation, naïve  
423 splenocytes was infected at 37 °C for 5 h with WR-VACV at a MOI of 5 in RPMI medium  
424 supplemented with 10% FCS. After infection, the cells were washed 3 times with PBS, and co-  
425 cultured ( $5 \times 10^5$  cells/well) with effector cell at a 1:1 ratio in 96 well plate in T cell medium at  
426 37 °C for 48 h. Uninfected naïve splenocytes co-cultured with target cells were used as negative  
427 controls. IFN- $\gamma$  concentration in the culture supernatants were measured by ELISA using anti-  
428 IFN- $\gamma$  mAb pairs (BD Pharmingen) according to manufacturer's protocol.

#### 429 **Preparation of cell suspensions**

430 Lymph nodes and spleens were harvested and pressed through a 70- $\mu$ m nylon cell strainer to  
431 prepare cell suspensions. Red blood cells (RBC) were lysed using RBC lysis buffer (00-4333-57;  
432 eBioscience). Skin tissue was excised after hair removal, separated into dorsal and ventral  
433 halves, minced, and then incubated in Hanks balanced salt solution (HBSS) supplemented with  
434 1 mg/ml collagenase A (11088785103; Roche) and 40  $\mu$ g/ml DNase I (10104159001; Roche) at  
435 37 °C for 30 min. After filtration through a 70- $\mu$ m nylon cell strainer, cells were collected and  
436 washed three times with cold PBS before staining.

#### 437 **Mouse adoptive transfer and treatment**

438 Lymph nodes were collected from naïve female donor mice at age of 6-8 weeks. T cells were  
439 purified by magnetic cell sorting using a mouse CD8 $\alpha$ <sup>+</sup> T-cell isolation kit (130-104-075;  
440 Miltenyi Biotec) or a mouse CD4<sup>+</sup> T-cell isolation kit (130-104-454; Miltenyi Biotec), according  
441 to the manufacturer's protocols. T cells were then transferred intravenously into female recipient  
442 mice at a total number of  $5 \times 10^5$ . T cells were labeled with carboxyfluorescein succinimidyl  
443 ester (CFSE, 65-0850; eBioscience) before co-transfer, where indicated. In some experiments,  
444 mice were treated daily with FTY720 (10006292; CAYMAN, 1 mg/kg) by intraperitoneal  
445 injection.

#### 446 **Microarray, data analysis and quantitative real-time PCR**

447 For each group of microarray dataset, OT-I cells from 15-20 mice were sorted with a FACS Aria  
448 III (BD Biosciences) and pooled. RNA was extracted with a RNeasy Micro kit (74004; Qiagen).  
449 RNA quality and quantity were assessed with a Bioanalyzer 2100 (Agilent). Then RNA was  
450 amplified and converted into cDNA by a linear amplification method with WT-Ovation Pico  
451 System (3302-60; Nugen). Subsequently cDNA was labeled with the Encore Biotin module  
452 (4200-60; Nugen) and hybridized to GeneChip MouseGene 2.0 ST chips (Affymetrix) at the  
453 Translational Genomics Core of Partners Healthcare, Harvard Medical School. GeneChips were  
454 scanned using the Affymetrix GeneChip Scanner 3000 7G running Affymetrix Gene Command  
455 Console version 3.2. The data were analyzed by using Affymetrix Expression Console version  
456 1.3.0.187 using Analysis algorithm RMA. To evaluate overall performance of microarray data,  
457 principal component analysis (PCA) and Pearson correlation coefficients among 12 diverse  
458 samples were applied by using 26,662 transcripts (R Program). All microarray data was  
459 submitted to the Gene Expression Omnibus.

460 For relative quantitative real-time PCR, RNA was prepared as described above. Bio-Rad iCycler  
461 iQ Real-Time PCR Detection System (Bio-Rad) was used with the following settings: 45 cycles  
462 of 15 s of denaturation at 95 °C, and 1 min of primer annealing and elongation at 60 °C. Real-  
463 time PCR was performed with 1 µl cDNA plus 12.5 µl of 2× iQ SYBR Green Supermix (Bio-  
464 Rad) and 0.5 µl (10 µM) specific primers. For absolute quantitative real-time PCR, each standard  
465 curve was constructed using 10-fold serial dilutions of target gene template ranging from 10<sup>7</sup> to  
466 10<sup>2</sup> copies per mL and obtained by plotting values of the logarithm of their initial template copy  
467 numbers versus the mean Ct values. The actual copy numbers of target genes were determined  
468 by relating the Ct value to a standard curve.

#### 469 **Determination of viral load**

470 Viral load in various tissues following MVA or VACV skin scarification was determined by  
471 quantitative real-time PCR, as previously described (17). Briefly, DNA was purified using the  
472 DNeasy Mini Kit (Qiagen, Valencia, CA). The primers and TagMan probe used in the  
473 quantitative PCR assay are specific for the ribonucleotide reductase Vv14L of vaccinia virus. The  
474 sequences are: (forward) 5'-GAC ACT CTG GCA GCC GAA AT-3'; (reverse) 5'-CTG GCG  
475 GCT AGA ATG GCA TA-3'; (probe) 5'-AGC AGC CAC TTG TAC TAC ACA ACA TCC  
476 GGA-3'. The probe was 5'-labeled with FAM and 3'-labeled with TAMRA (Applied Biosystems,  
477 Foster City, CA). Real-time PCR was performed with the Bio-Rad iCycler iQ<sup>TM</sup> Real-Time  
478 PCR Detection System (Bio-Rad Laboratories). Thermal cycling conditions were 50°C for 2 min  
479 and 95°C for 10 min for one cycle, followed by 45 cycles of amplification (94°C for 15 s and  
480 60°C for 1 min). Standard curve was established from DNA of an MVA or VACV stock with  
481 previously determined titer. Corresponding CT values obtained by the real time PCR reactions

482 were plotted on the standard curve to calculate viral load in the samples. The number of viral  
483 DNA copies was normalized to that in the skin samples of uninfected naïve mice.

#### 484 **Statistical analysis**

485 Comparisons for two groups were calculated using Student's t test (two tailed). Comparisons for  
486 more than two groups were calculated with one-way analysis of variance (ANOVA) followed by  
487 Bonferroni's multiple comparison tests. Two-way ANOVA with Holm–Bonferroni post hoc  
488 analysis was used to compare weight loss between groups and Log-rank (Mantel-Cox) test was  
489 used for survival curves.  $p < 0.05$  was considered statistically significant.

490



491 REFERENCES

- 492 1. Hilleman, M.R. Vaccines in historic evolution and perspective: a narrative of vaccine  
493 discoveries. *Vaccine* **18**, 1436-1447 (2000).
- 494 2. Radetsky, M. Smallpox: a history of its rise and fall. *Pediatr Infect Dis J* **18**, 85-93  
495 (1999).
- 496 3. Bandyopadhyay, A.S., Garon, J., Seib, K. & Orenstein, W.A. Polio vaccination: past,  
497 present and future. *Future Microbiol* **10**, 791-808 (2015).
- 498 4. Deforest, A., *et al.* Simultaneous administration of measles-mumps-rubella vaccine with  
499 booster doses of diphtheria-tetanus-pertussis and poliovirus vaccines. *Pediatrics* **81**, 237-  
500 246 (1988).
- 501 5. Orenstein, W.A., Seib, K., Graham-Rowe, D. & Berkley, S. Contemporary vaccine  
502 challenges: improving global health one shot at a time. *Sci Transl Med* **6**, 253ps211  
503 (2014).
- 504 6. Pollara, J., Easterhoff, D. & Fouda, G.G. Lessons learned from human HIV vaccine trials.  
505 *Curr Opin HIV AIDS* **12**, 216-221 (2017).
- 506 7. Pica, N. & Palese, P. Toward a universal influenza virus vaccine: prospects and  
507 challenges. *Annu Rev Med* **64**, 189-202 (2013).
- 508 8. Tapia, M.D., *et al.* Safety, reactogenicity, and immunogenicity of a chimpanzee  
509 adenovirus vectored Ebola vaccine in adults in Africa: a randomised, observer-blind,  
510 placebo-controlled, phase 2 trial. *Lancet Infect Dis* (2020).
- 511 9. Hui, D.S.C. & Zumla, A. Severe Acute Respiratory Syndrome: Historical,  
512 Epidemiologic, and Clinical Features. *Infect Dis Clin North Am* **33**, 869-889 (2019).
- 513 10. Shang, W., Yang, Y., Rao, Y. & Rao, X. The outbreak of SARS-CoV-2 pneumonia calls  
514 for viral vaccines. *NPJ Vaccines* **5**, 18 (2020).
- 515 11. Liu, L., *et al.* Epidermal injury and infection during poxvirus immunization is crucial for  
516 the generation of highly protective T cell-mediated immunity. *Nat Med* **16**, 224-227  
517 (2010).
- 518 12. Ho, A.W. & Kupper, T.S. T cells and the skin: from protective immunity to inflammatory  
519 skin disorders. *Nat Rev Immunol* **19**, 490-502 (2019).
- 520 13. Hruby, D.E. Vaccinia virus vectors: new strategies for producing recombinant vaccines.  
521 *Clin Microbiol Rev* **3**, 153-170 (1990).
- 522 14. Belongia, E.A. & Naleway, A.L. Smallpox vaccine: the good, the bad, and the ugly. *Clin*  
523 *Med Res* **1**, 87-92 (2003).
- 524 15. Guzman, E., *et al.* Modified vaccinia virus Ankara-based vaccine vectors induce  
525 apoptosis in dendritic cells draining from the skin via both the extrinsic and intrinsic  
526 caspase pathways, preventing efficient antigen presentation. *J Virol* **86**, 5452-5466  
527 (2012).
- 528 16. Antoine, G., Scheiflinger, F., Dorner, F. & Falkner, F.G. The complete genomic sequence  
529 of the modified vaccinia Ankara strain: comparison with other orthopoxviruses. *Virology*  
530 **244**, 365-396 (1998).
- 531 17. Pittman, P.R., *et al.* Phase 3 Efficacy Trial of Modified Vaccinia Ankara as a Vaccine  
532 against Smallpox. *N Engl J Med* **381**, 1897-1908 (2019).
- 533 18. Cottingham, M.G. & Carroll, M.W. Recombinant MVA vaccines: dispelling the myths.  
534 *Vaccine* **31**, 4247-4251 (2013).

- 535 19. Altenburg, A.F., *et al.* Modified vaccinia virus ankara (MVA) as production platform for  
536 vaccines against influenza and other viral respiratory diseases. *Viruses* **6**, 2735-2761  
537 (2014).
- 538 20. Bray, M. Understanding smallpox vaccination. *J Infect Dis* **203**, 1037-1039 (2011).
- 539 21. Gordon, S.N., *et al.* Smallpox vaccine safety is dependent on T cells and not B cells. *J*  
540 *Infect Dis* **203**, 1043-1053 (2011).
- 541 22. Kennedy, J.S., *et al.* Induction of human T cell-mediated immune responses after primary  
542 and secondary smallpox vaccination. *J Infect Dis* **190**, 1286-1294 (2004).
- 543 23. Milton, D.K. What was the primary mode of smallpox transmission? Implications for  
544 biodefense. *Front Cell Infect Microbiol* **2**, 150 (2012).
- 545 24. Terajima, M., *et al.* Identification of vaccinia CD8+ T-cell epitopes conserved among  
546 vaccinia and variola viruses restricted by common MHC class I molecules, HLA-A2 or  
547 HLA-B7. *Hum Immunol* **67**, 512-520 (2006).
- 548 25. Eaglesham, J.B., Pan, Y., Kupper, T.S. & Kranzusch, P.J. Viral and metazoan poxins are  
549 cGAMP-specific nucleases that restrict cGAS-STING signalling. *Nature* **566**, 259-263  
550 (2019).
- 551 26. Pan, Y., *et al.* Survival of tissue-resident memory T cells requires exogenous lipid uptake  
552 and metabolism. *Nature* **543**, 252-256 (2017).
- 553 27. von Andrian, U.H. & Mackay, C.R. T-cell function and migration. Two sides of the same  
554 coin. *N Engl J Med* **343**, 1020-1034 (2000).
- 555 28. Kupper, T.S. & Fuhlbrigge, R.C. Immune surveillance in the skin: mechanisms and  
556 clinical consequences. *Nat Rev Immunol* **4**, 211-222 (2004).
- 557 29. Park, C.O. & Kupper, T.S. The emerging role of resident memory T cells in protective  
558 immunity and inflammatory disease. *Nat Med* **21**, 688-697 (2015).
- 559 30. Hessel, A., *et al.* MVA vectors expressing conserved influenza proteins protect mice  
560 against lethal challenge with H5N1, H9N2 and H7N1 viruses. *PLoS One* **9**, e88340  
561 (2014).
- 562 31. Olszewska, W., Suezer, Y., Sutter, G. & Openshaw, P.J. Protective and disease-  
563 enhancing immune responses induced by recombinant modified vaccinia Ankara (MVA)  
564 expressing respiratory syncytial virus proteins. *Vaccine* **23**, 215-221 (2004).

565

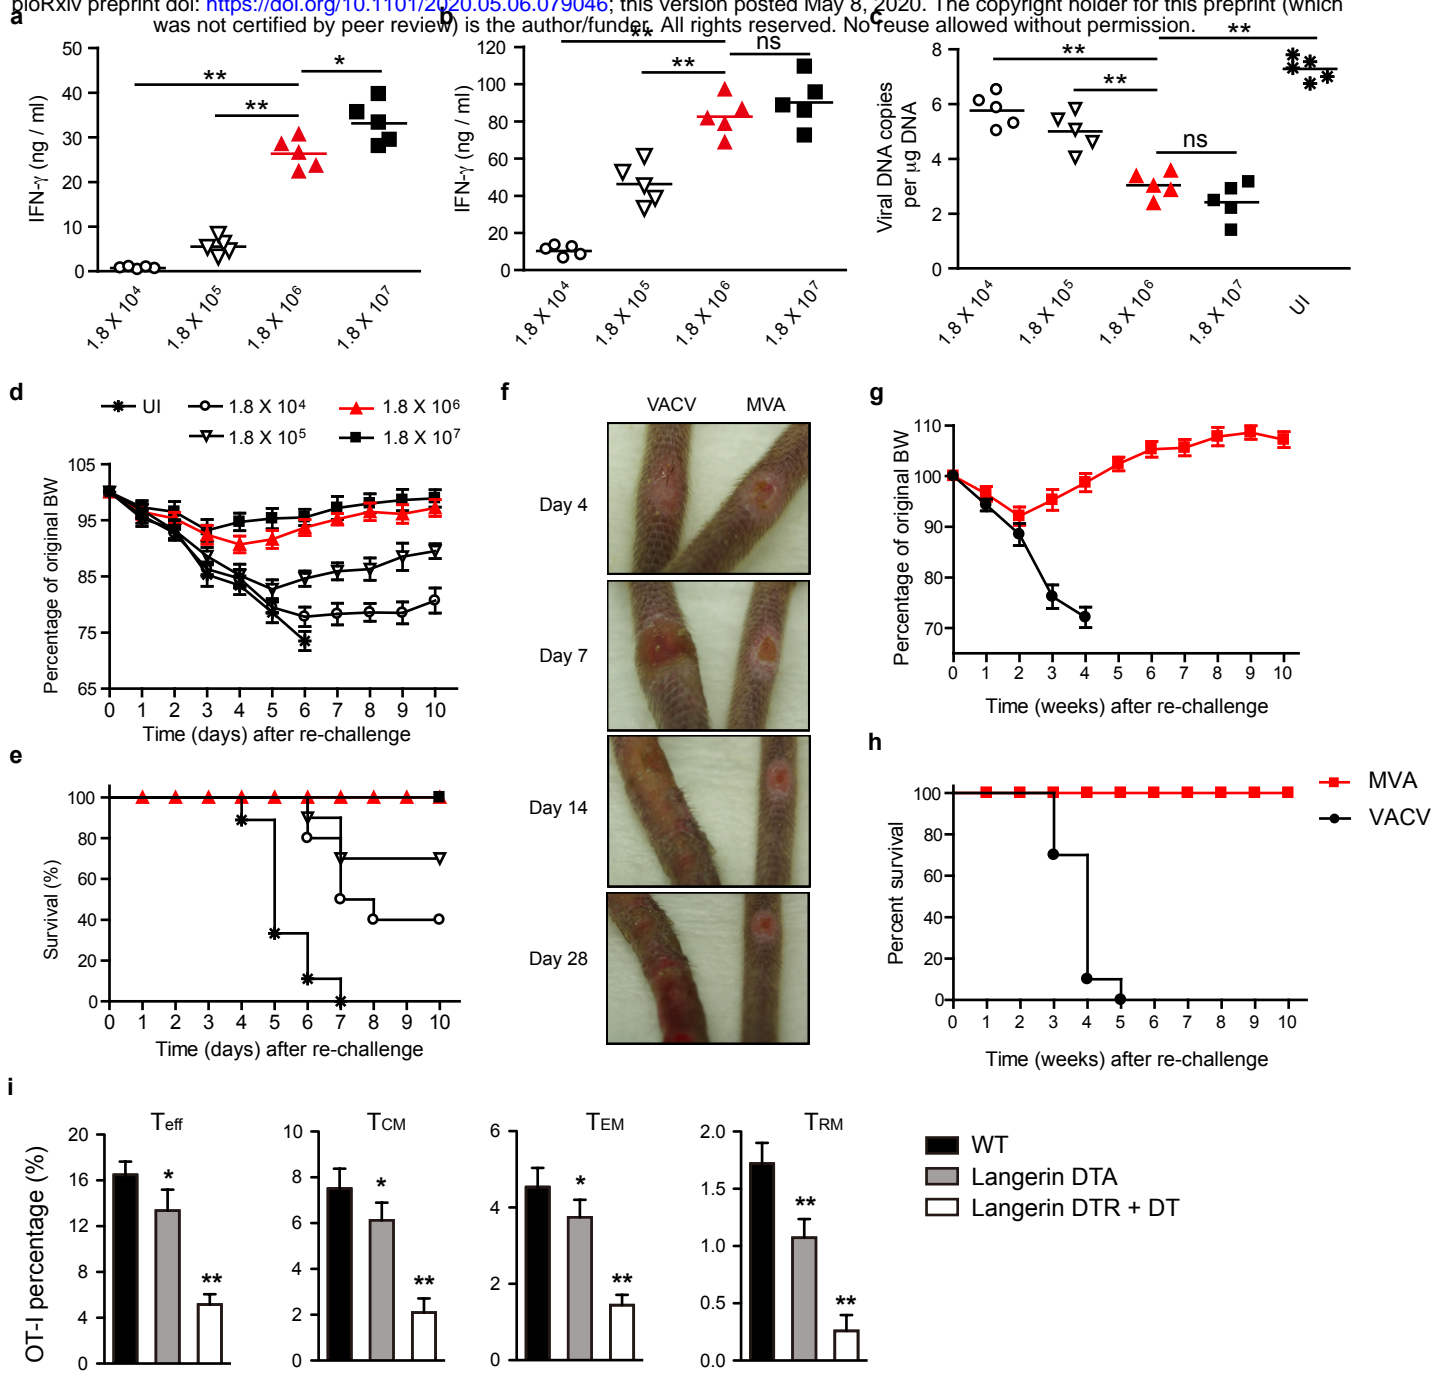

**Fig. 1**

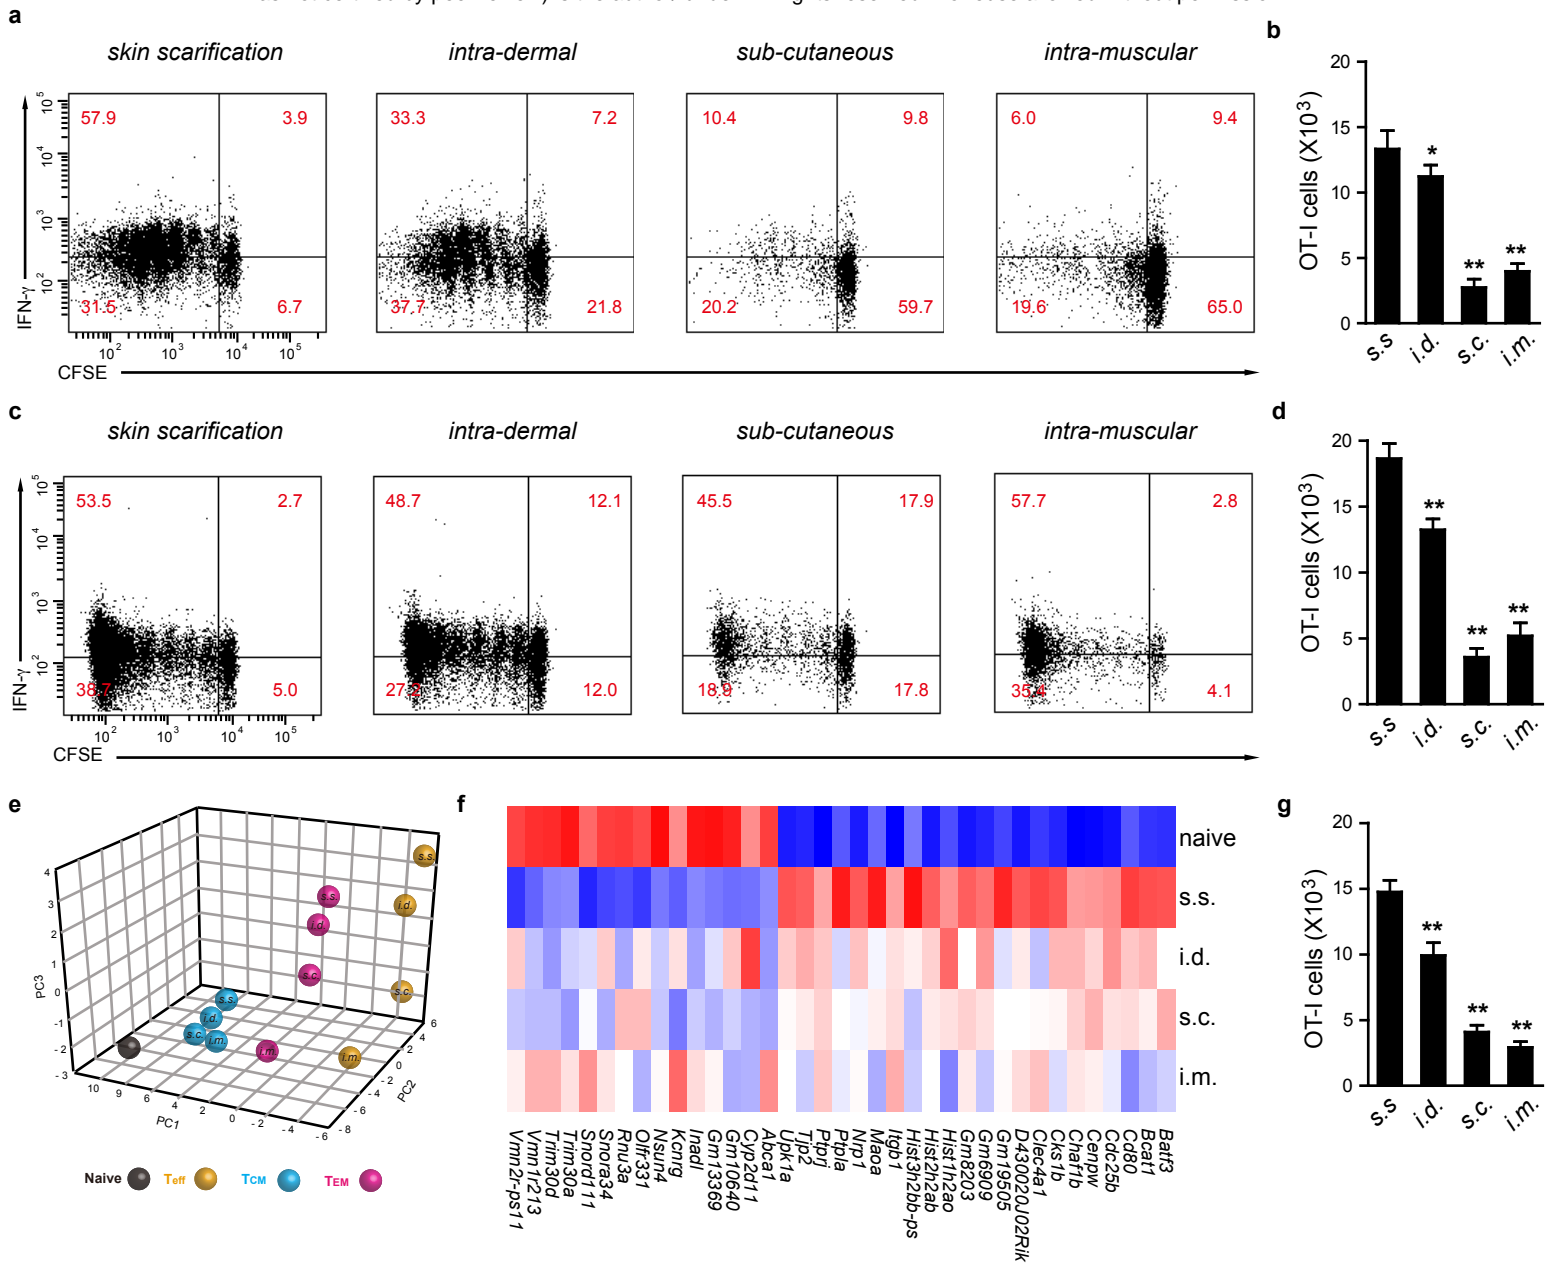

Fig. 2

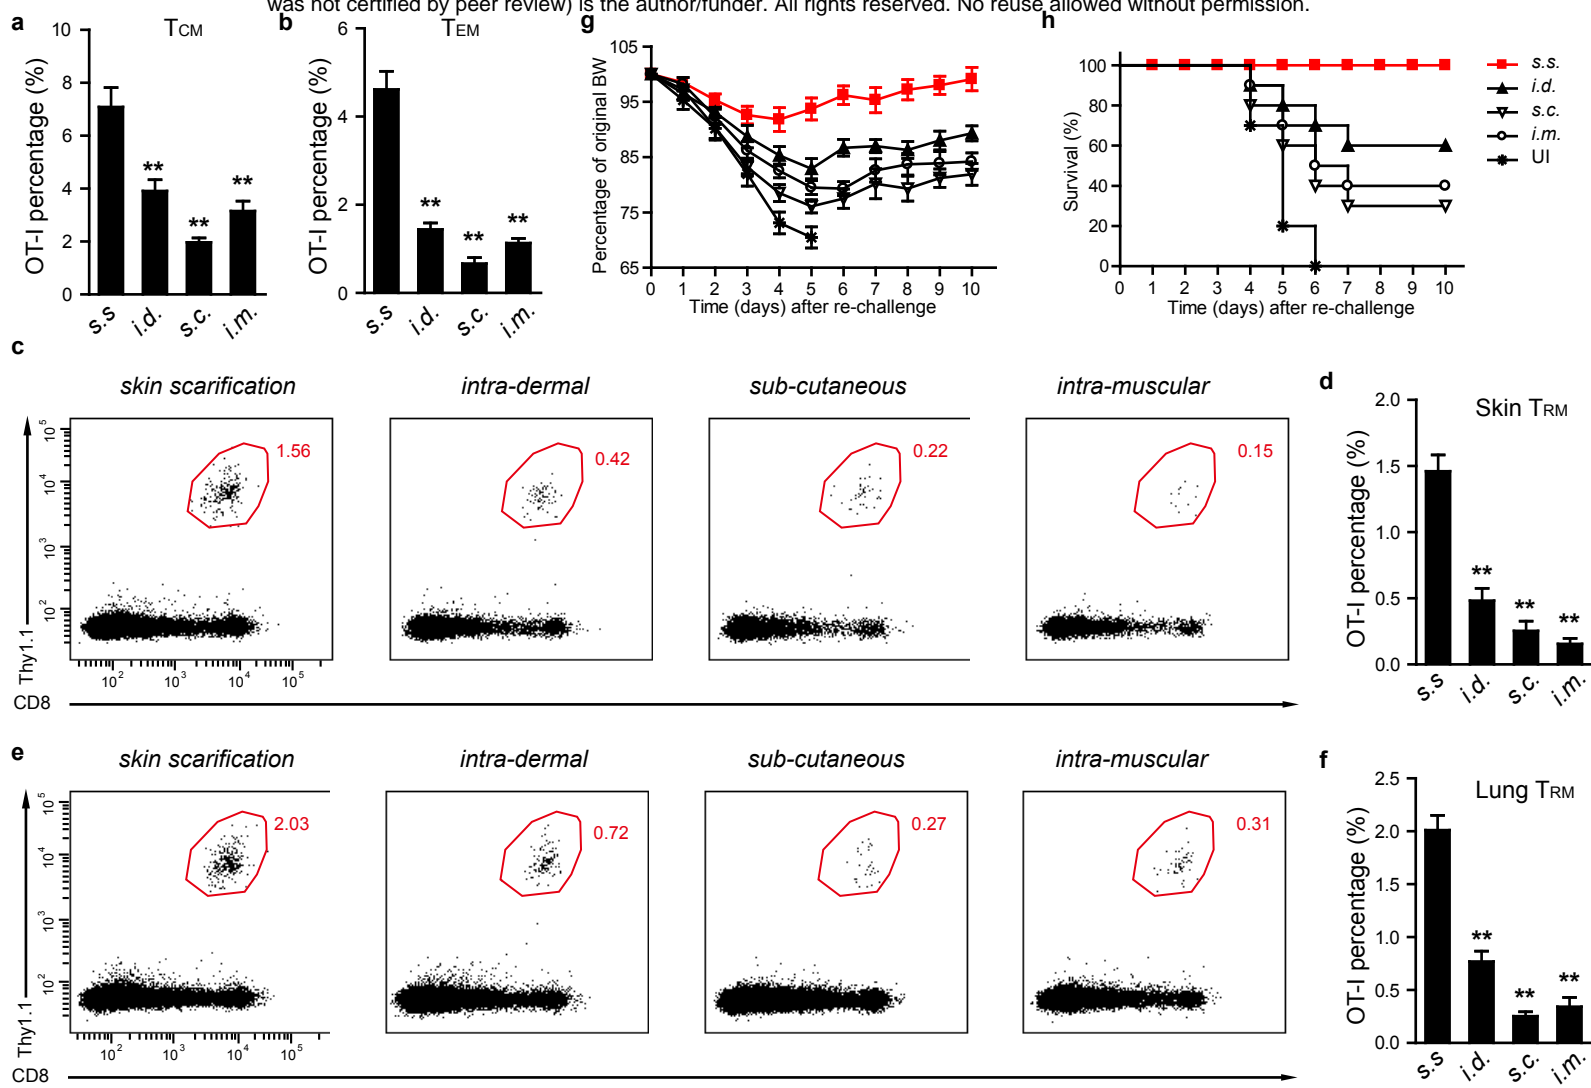

**Fig. 3**

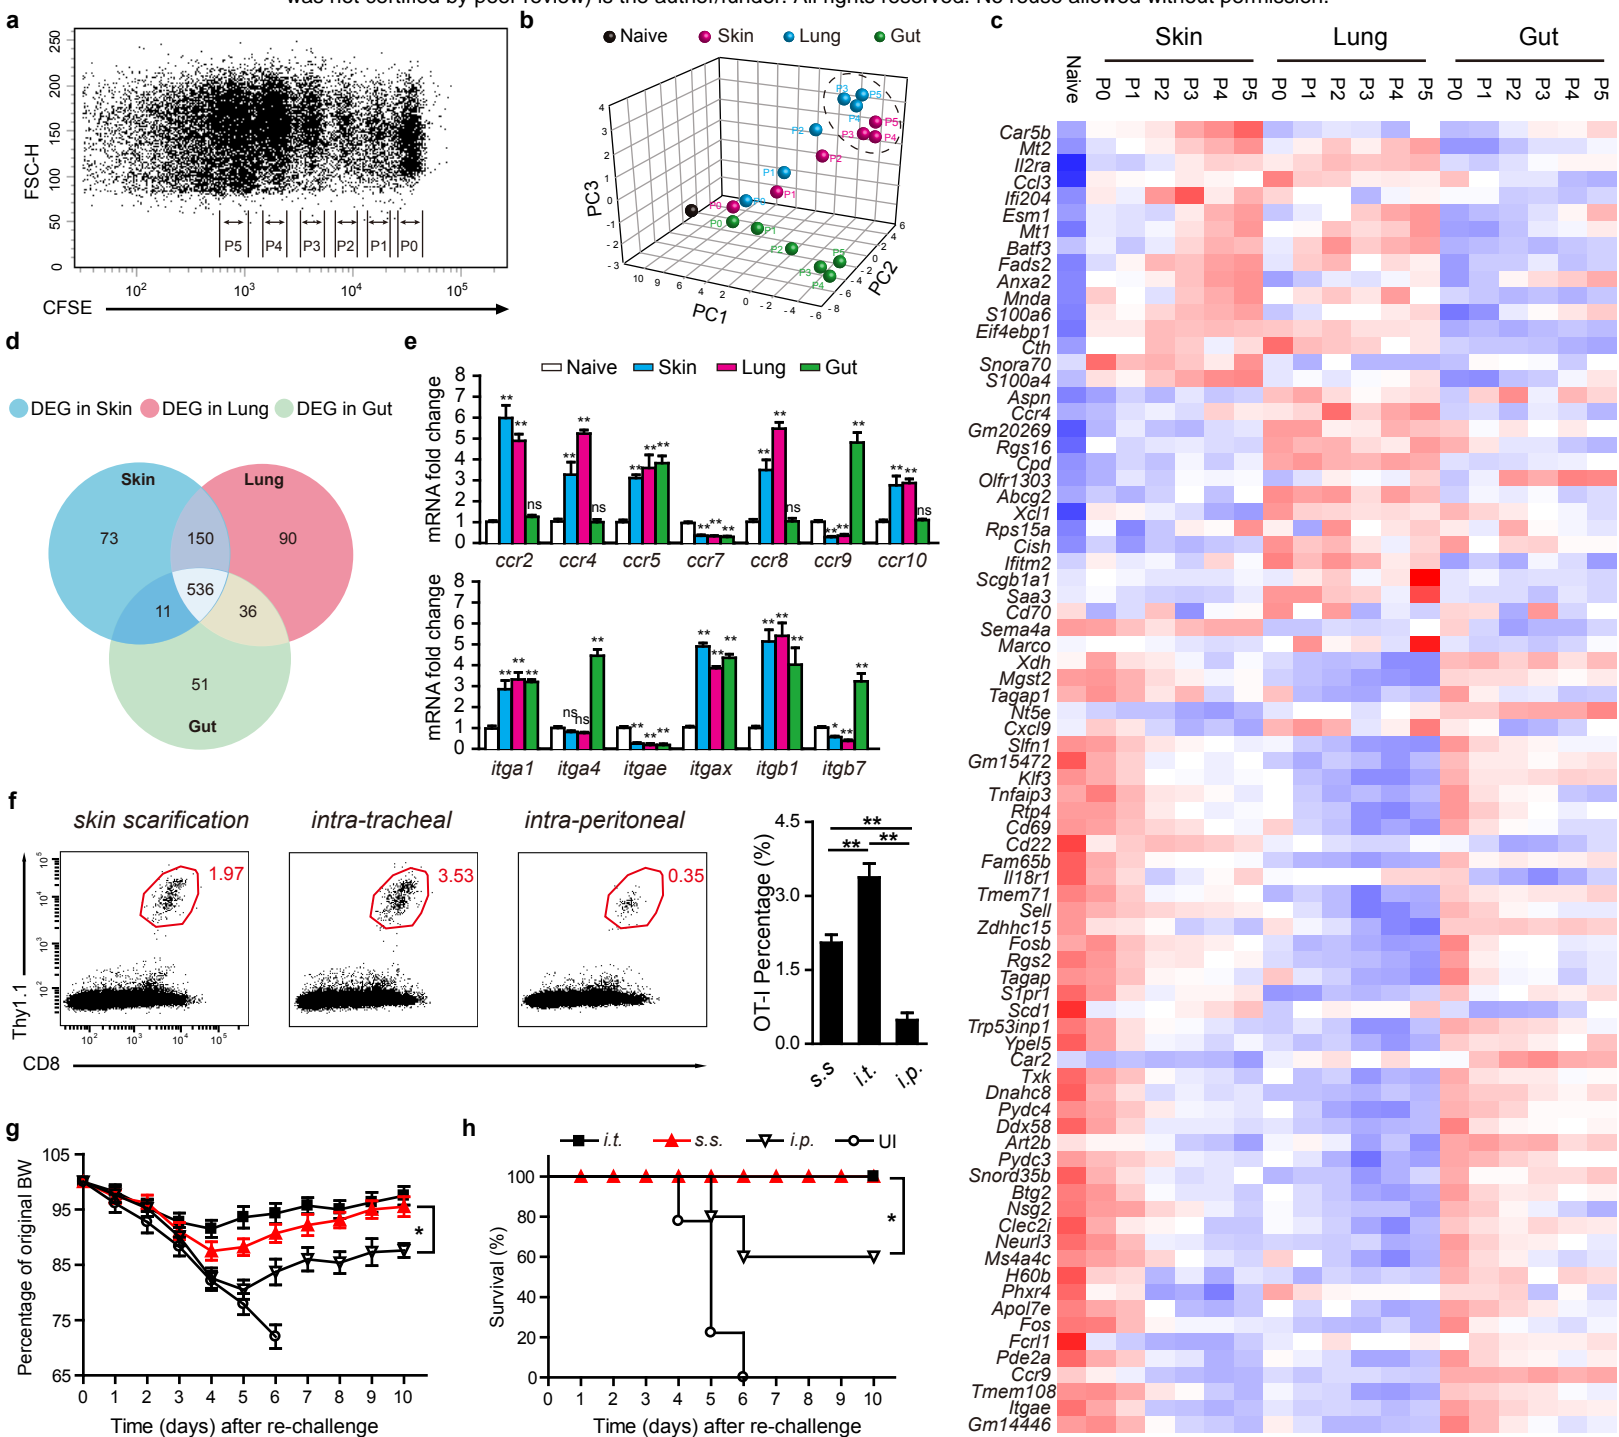

Day 4

Day 7

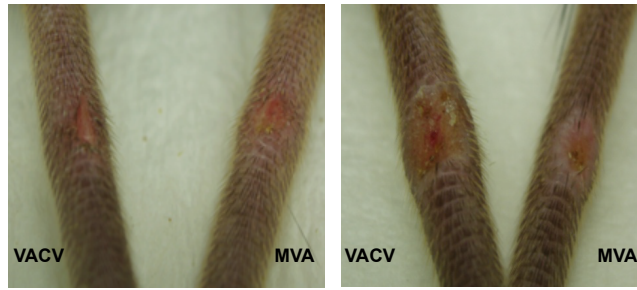

Day 14

Day 28

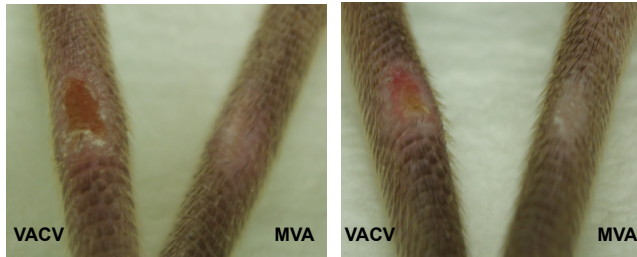

Extended data, Fig. 1

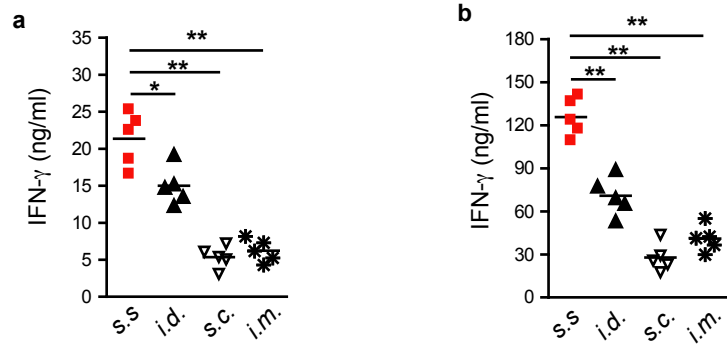

Extended data, Fig. 2



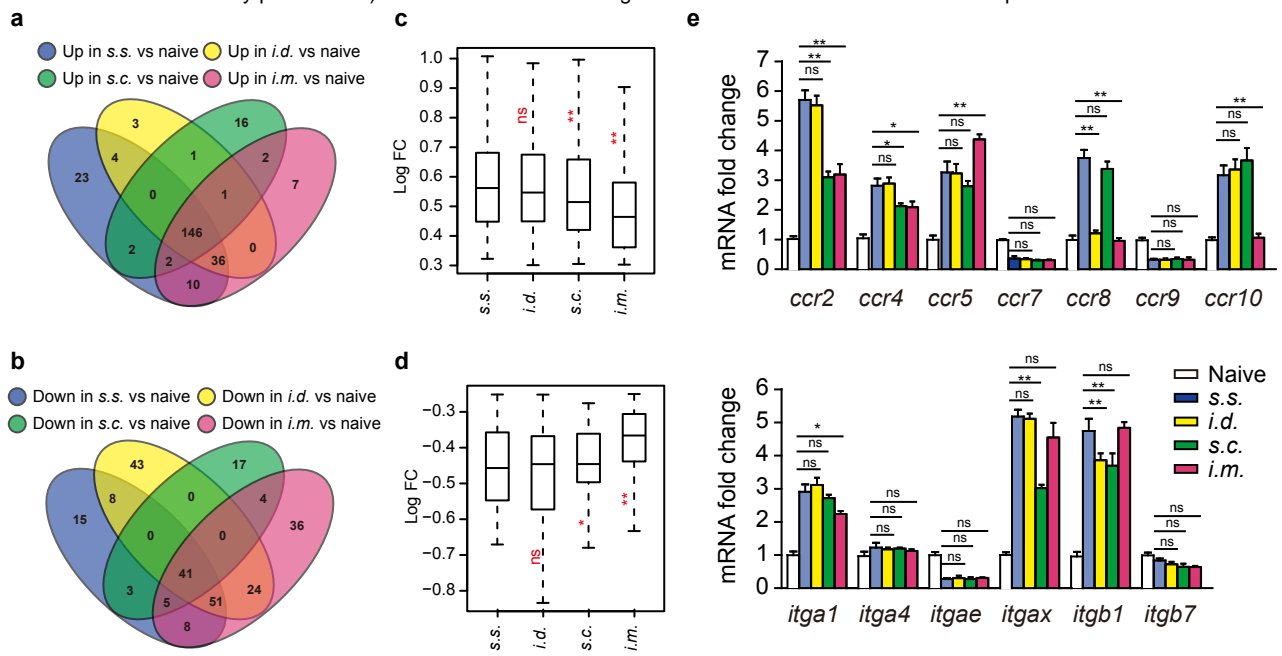

Extended data, Fig. 3

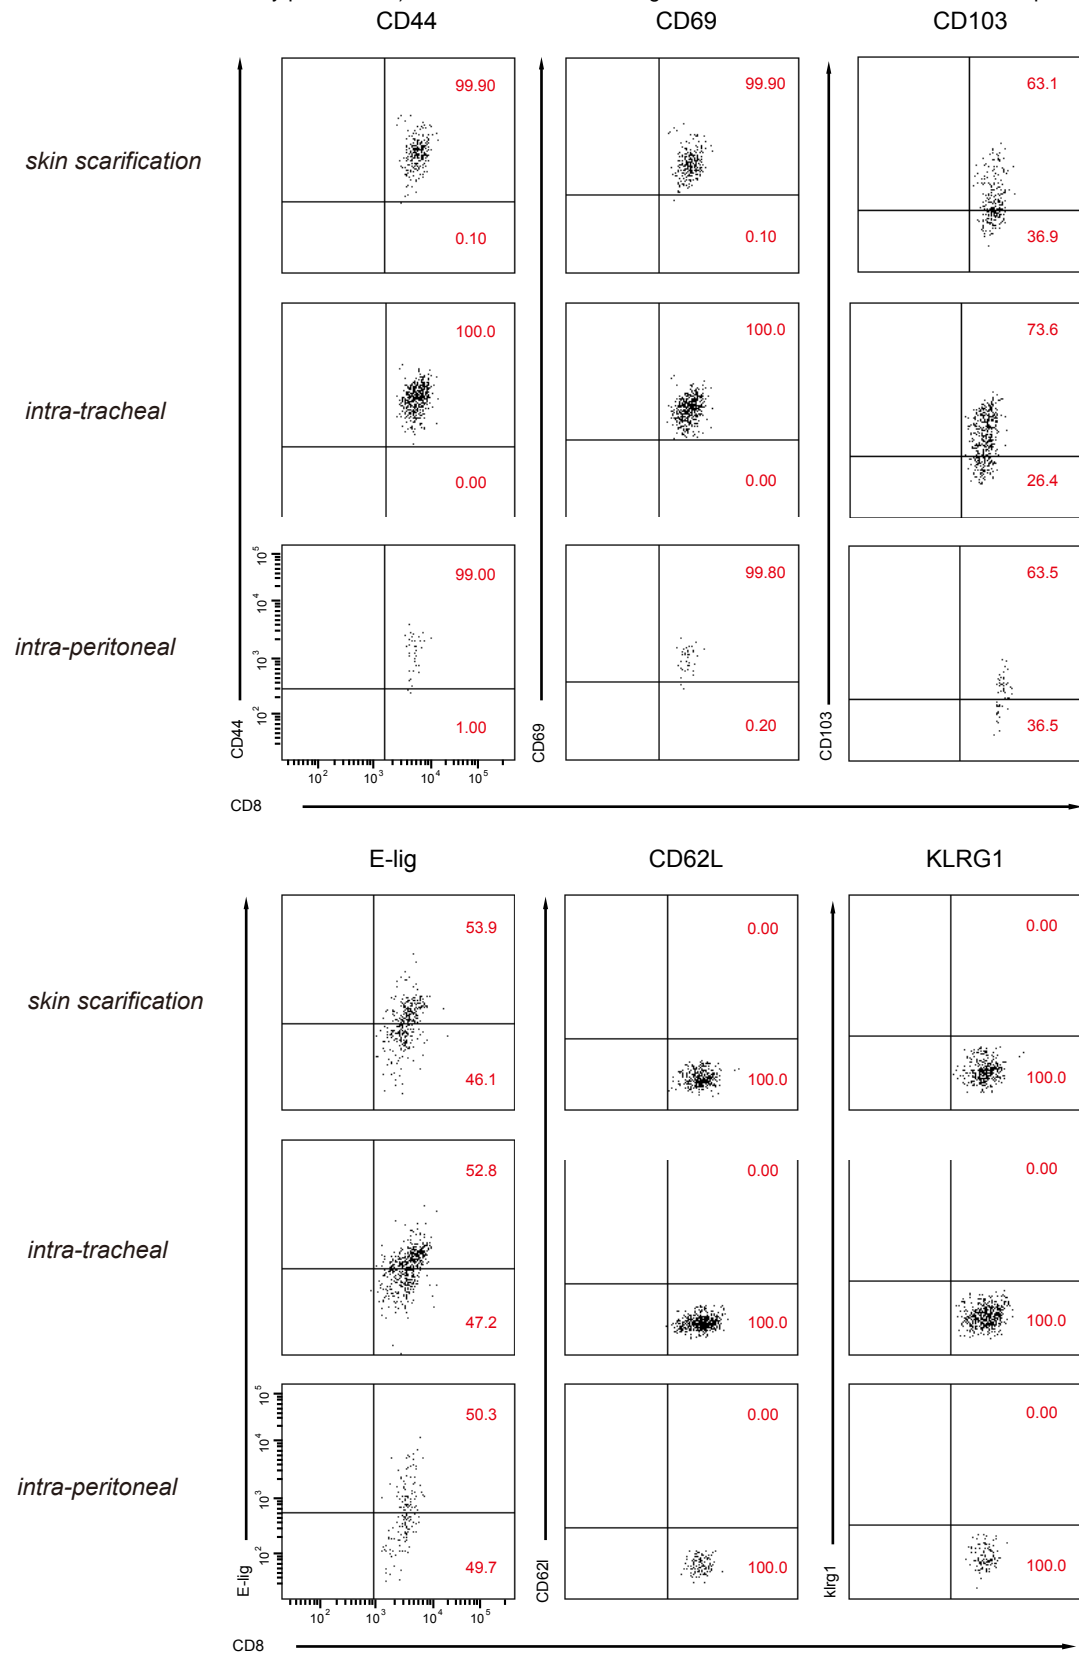

Extended data, Fig. 4

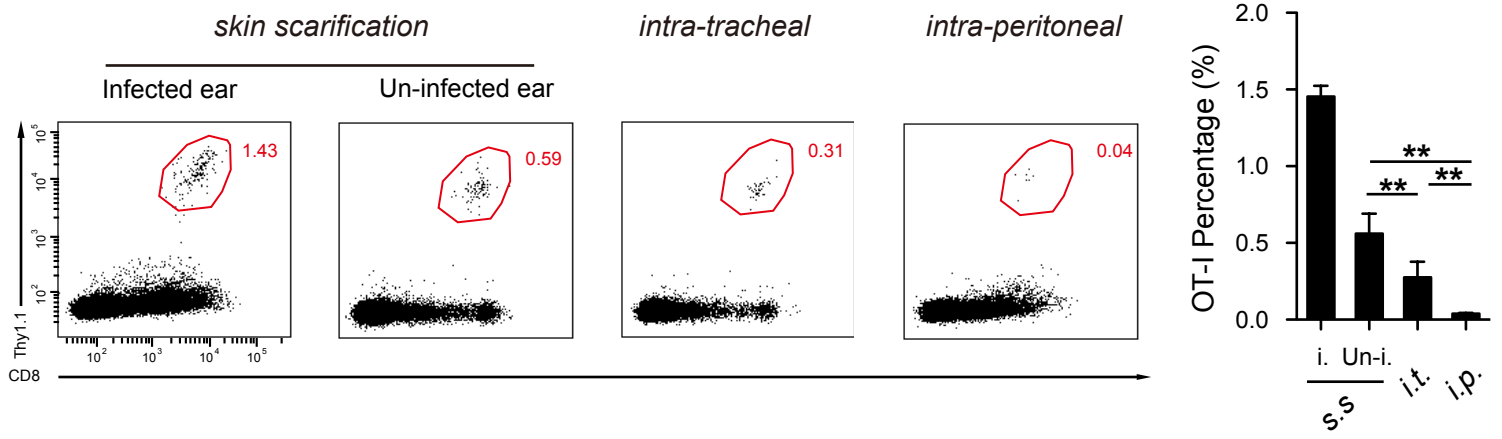

Extended data, Fig. 5
